# Supplementary material for: A simple MOF constructed using Pb(ii) with strong polarizing force: a filler of Nafion membrane to increase proton conductivity
Source: Royal Society of Chemistry journal article supplement (doi:10.1039/d3dt02911e), 2023-01-01
Supplement: d3dt02911e1.pdf [file d3dt02911e1.pdf]

## A simple MOF constructed by Pb(II) with strong polarizing force: a filler of Nafion membrane to increase proton conductivity

Jiawei Liu, Li Ding, Huiqi Zou, Zhipeng Huan, Houting Liu\*, Jing Lu\*, Suna Wang, Yunwu Li

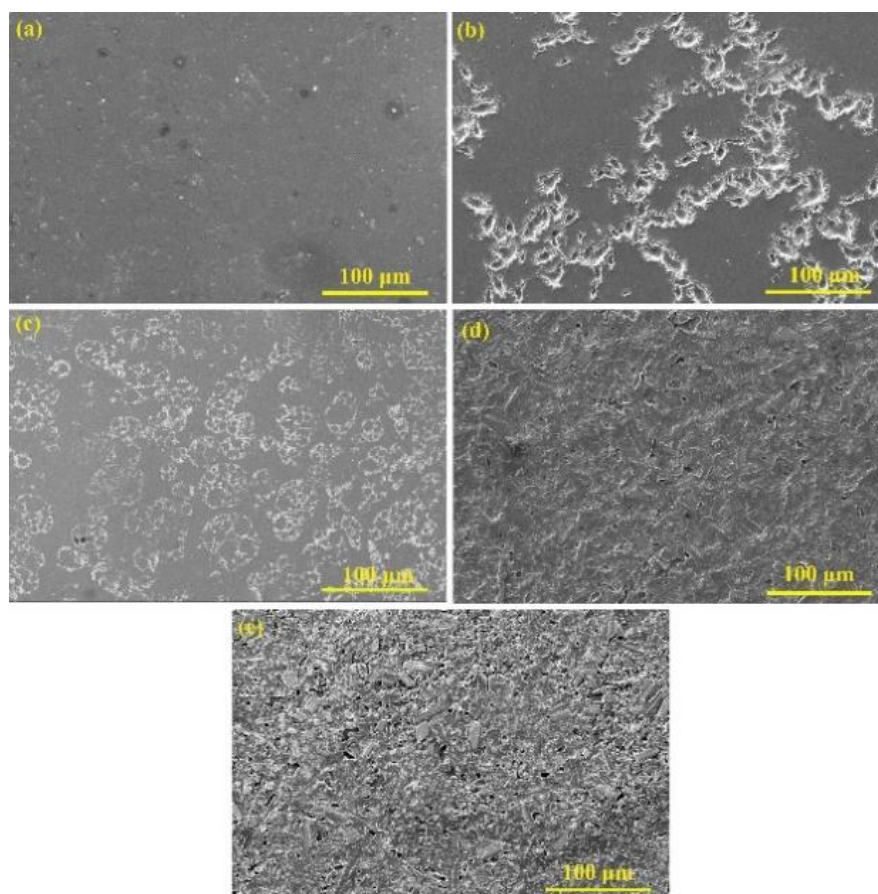

Fig. S1 The surface SEM images of (a) pure Nafion, (b) Pb-MOF/Nafion-3, (c) Pb-MOF/Nafion-5, (d) Pb-MOF/Nafion-7 and (e) Pb-MOF/Nafion-9.

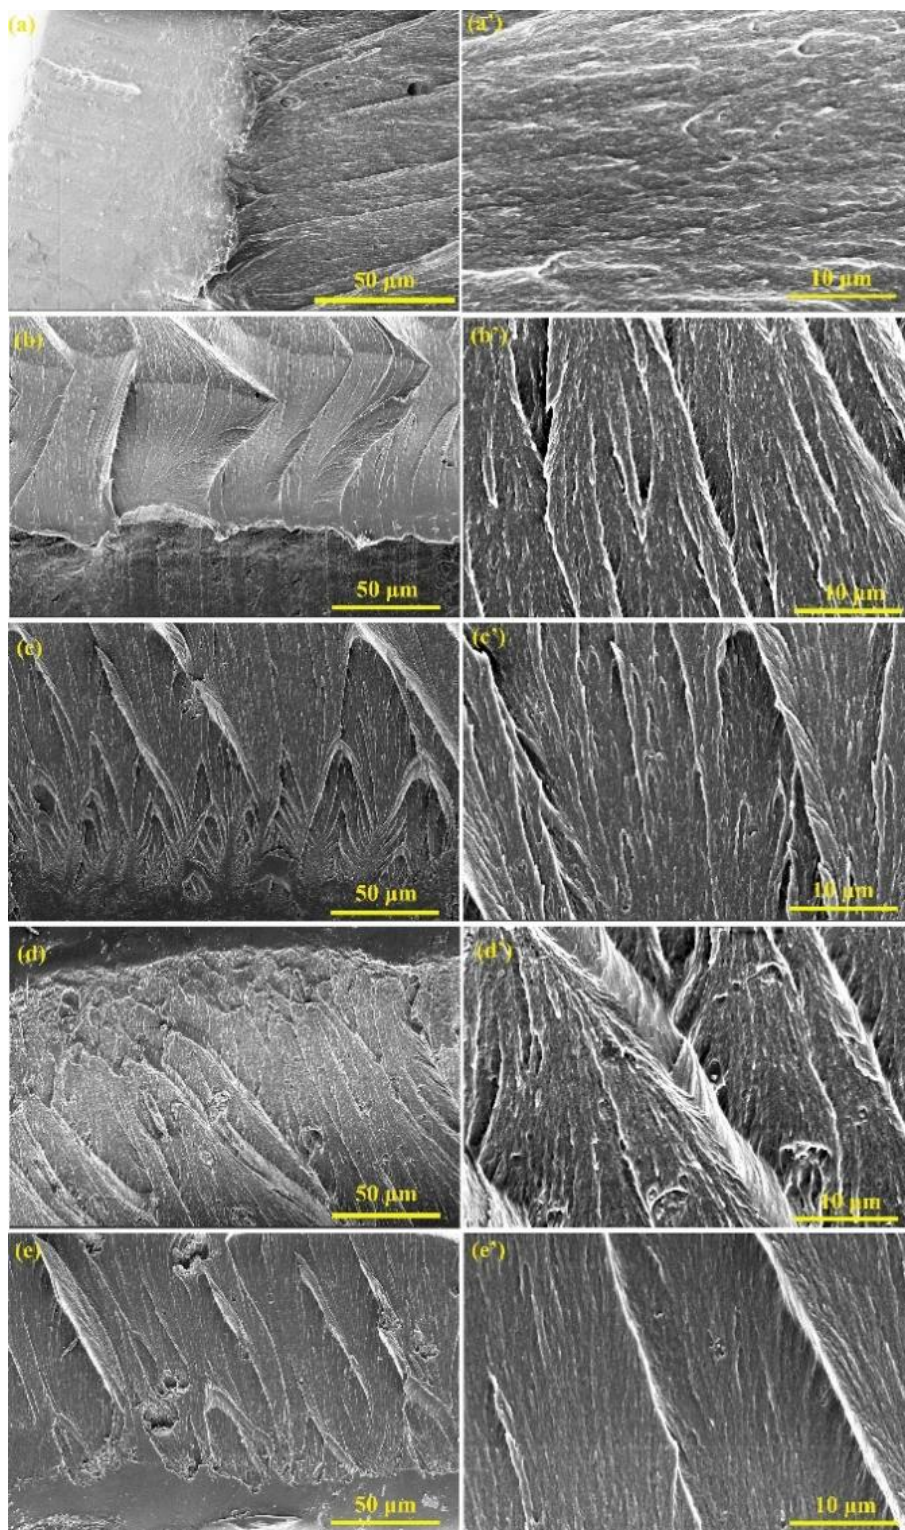

Fig. S2 The cross-sectional SEM images of pure Nafion (a and a'), Pb-MOF/Nafion-3 (b and b'), Pb-MOF/Nafion-5 (c and c'), Pb-MOF/Nafion-7 (d and d'), Pb-MOF/Nafion-9 (e and e').

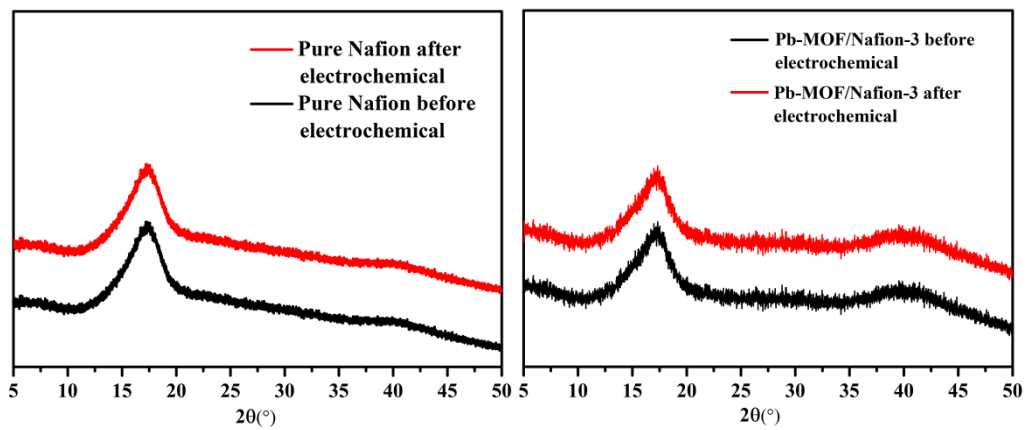

(a)

(b)

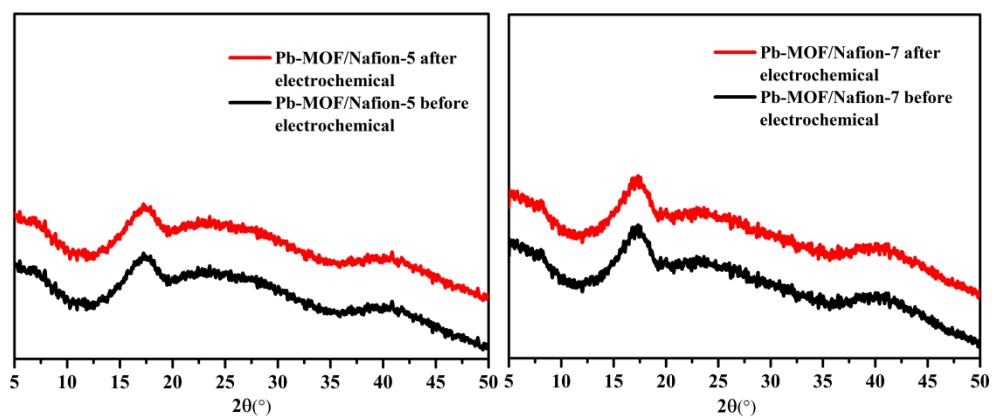

(c)

(d)

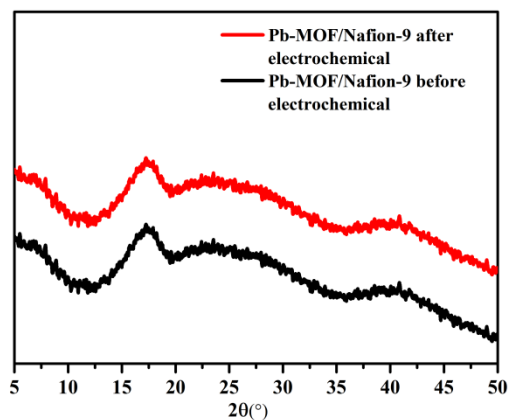

(e)

Fig. S3 (a) The PXRD patterns of pure Nafion membrane before and after the electrochemical experiment; (b, c, d and e) The PXRD patterns of Pb-MOF/Nafion composite membranes before and after the electrochemical experiment.

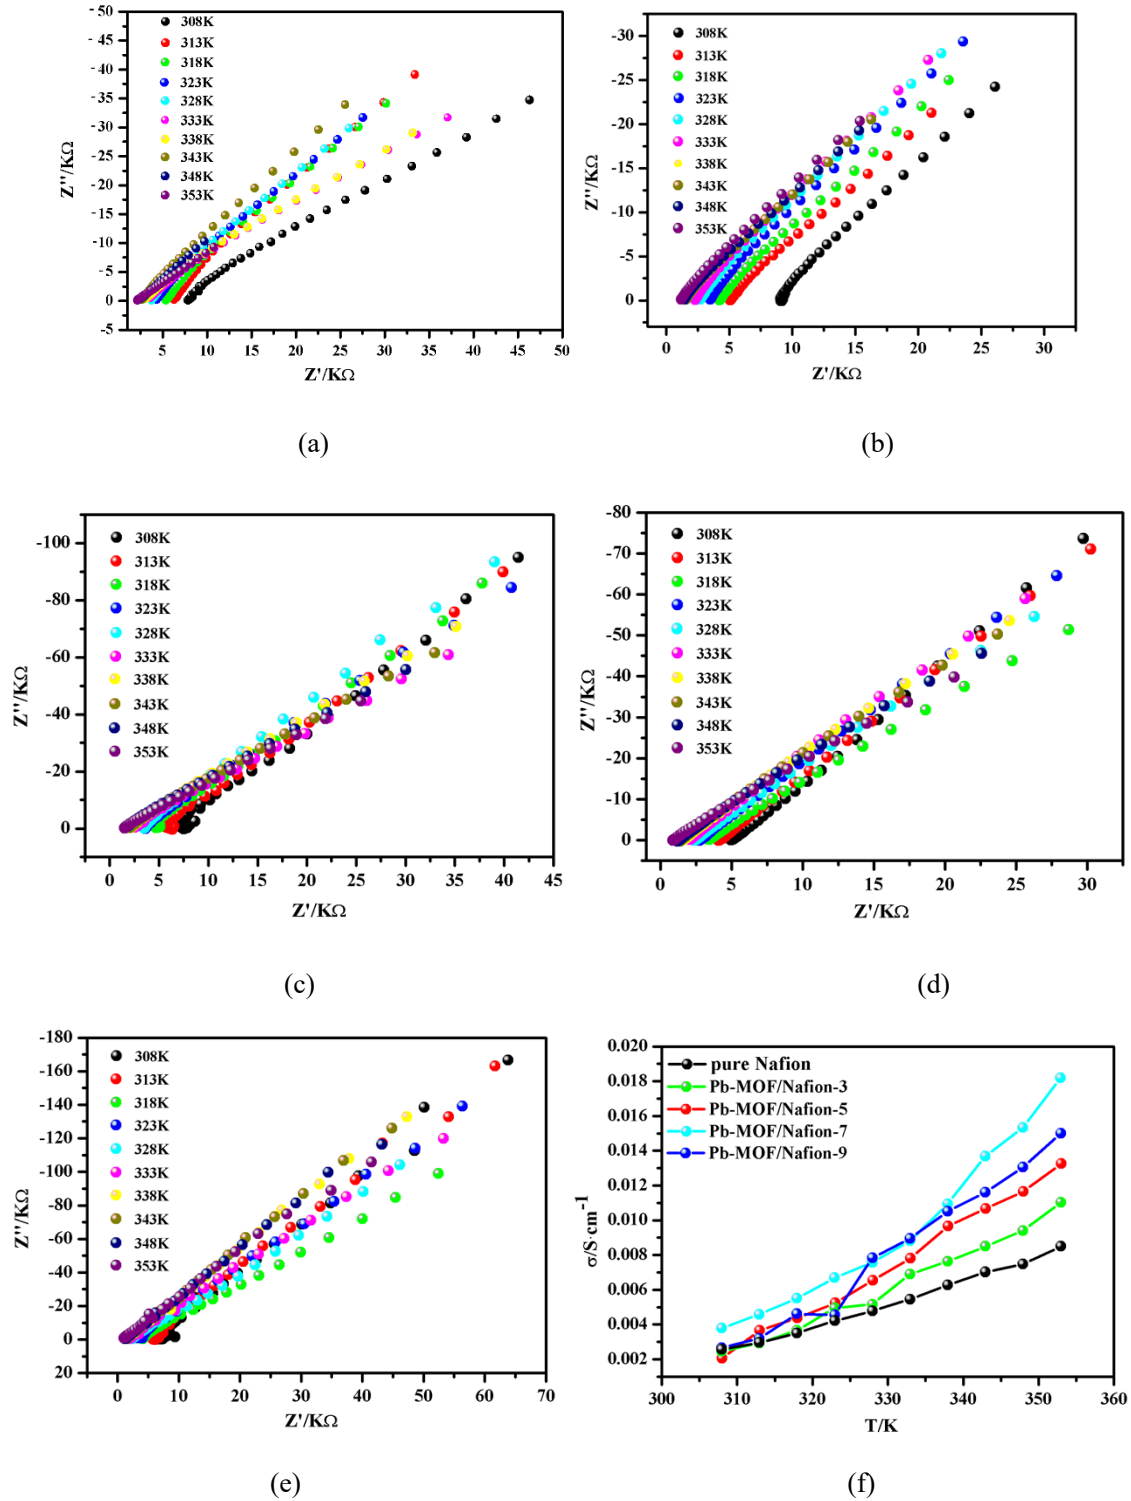

Fig. S4 Nyquist curves of (a) pure Nafion membrane; (b) Pb-MOF/Nafion-3 (c) Pb-MOF/Nafion-5; (d) Pb-MOF/Nafion-7; (e) Pb-MOF/Nafion-9 composite membranes at different temperatures.

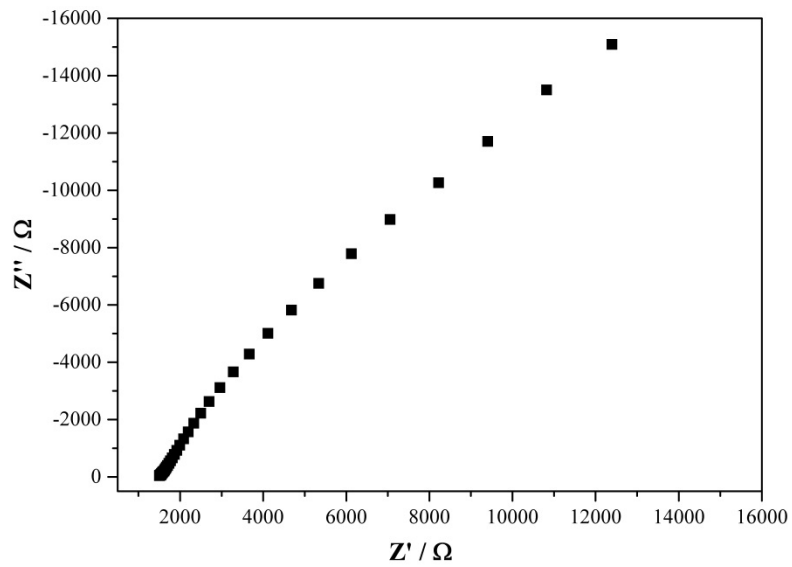

(a)

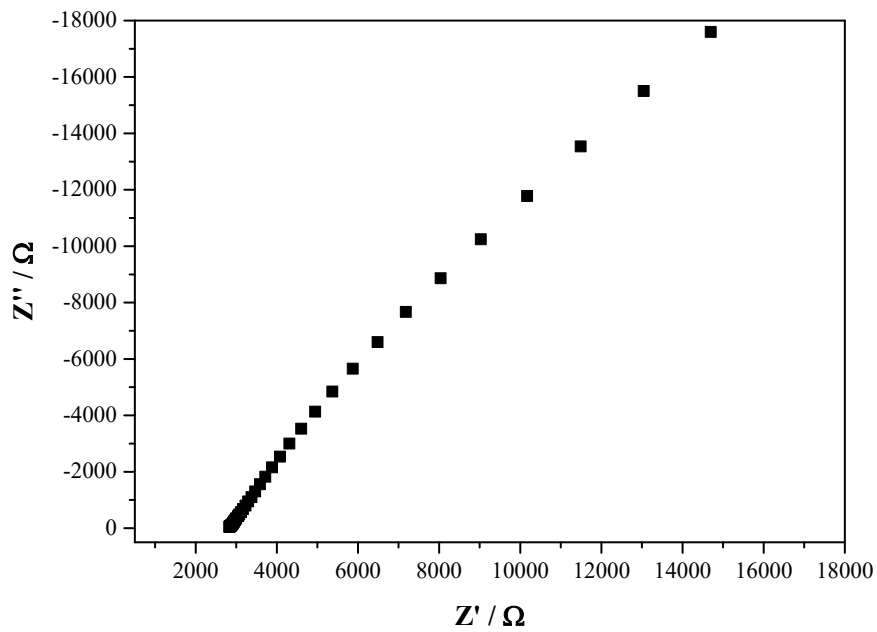

(b)

Fig. S5 Nyquist curves of (a)  $\text{PbAc}_2/\text{Nafion}$  and (b)  $\text{Na}_3\text{L}/\text{Nafion}$  composite membranes at 353K.

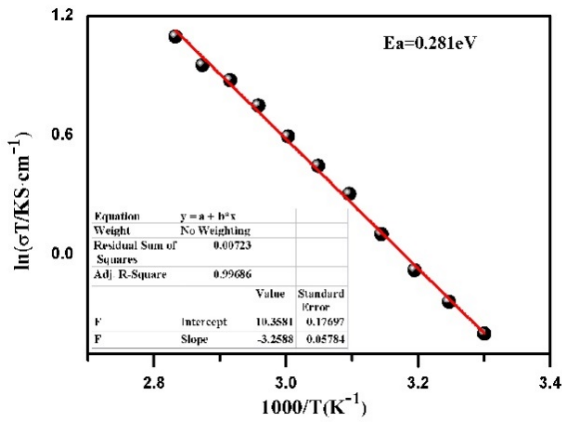

(a)

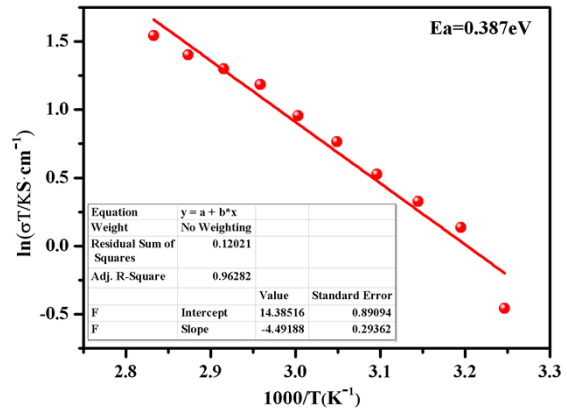

(b)

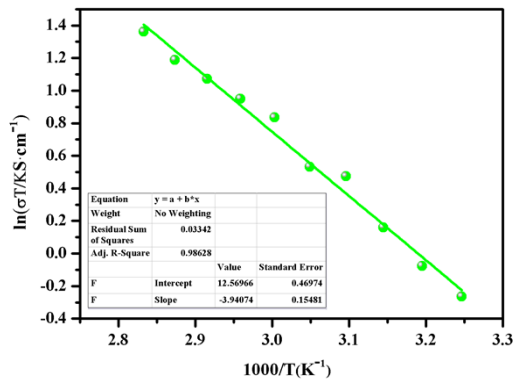

(c)

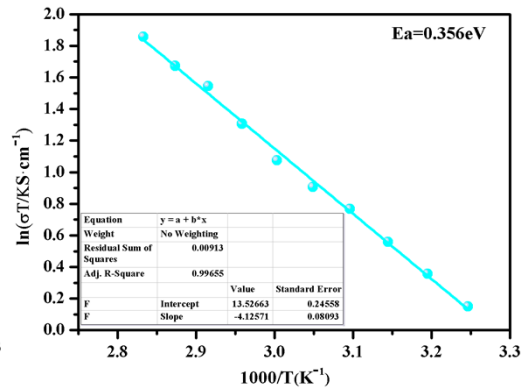

(d)

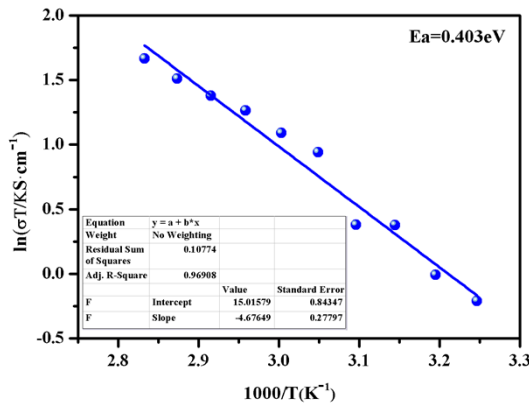

(e)

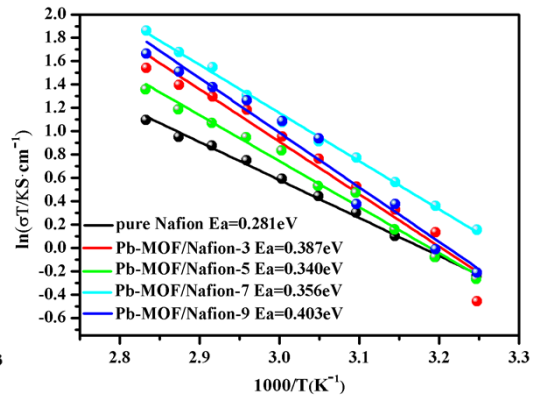

(f)

Fig. S6 Plot of  $\ln(\sigma_{H^+T})$  vs.  $1/T$  with fitted activity energy and  $R^2$  values of (a) pure Nafion membrane and (b) Pb-MOF/Nafion-3; (c) Pb-MOF/Nafion-5; (d) Pb-MOF/Nafion-7; (e) Pb-MOF/Nafion-9 composite membranes.

Table S1 Crystal and refinement data for Pb-MOF.

|                                        |                                                                |                                         |                                                     |
|----------------------------------------|----------------------------------------------------------------|-----------------------------------------|-----------------------------------------------------|
| Empirical formula                      | C <sub>8</sub> H <sub>4</sub> O <sub>8</sub> Pb <sub>2</sub> S | Absorption coefficient/mm <sup>-1</sup> | 58.256                                              |
| Formula weight                         | 674.55                                                         | θ range(°)                              | 3.953 - 67.197                                      |
| Crystal system                         | Monoclinic                                                     | Reflections collected, unique           | 6983, 2048                                          |
| space group                            | <i>P2<sub>1</sub>/c</i>                                        | R(int)                                  | 0.0442                                              |
| <i>a</i> /Å                            | 7.31490(13)                                                    | Limiting indices                        | -8≤ <i>h</i> ≤8, -26≤ <i>k</i> ≤17, -8≤ <i>l</i> ≤9 |
| <i>b</i> /Å                            | 22.3592(3)                                                     | Data/restraints/parameters              | 2048 / 0 / 173                                      |
| <i>c</i> /Å                            | 22.3592(3)                                                     | Completeness to θ= 67.02°/%             | 100.0%                                              |
| β/°                                    | 22.3592(3)                                                     | Refinement method                       | Full-matrix least-squares on F <sup>2</sup>         |
| Volume/Å <sup>3</sup>                  | 22.3592(3)                                                     | Goodness-of-fit on F <sup>2</sup>       | 1.113                                               |
| Z                                      | 4                                                              | Final R indices [I>2σ(I)]               | R1 = 0.0467, wR2 = 0.1189                           |
| D <sub>calc</sub> (Mg/m <sub>3</sub> ) | 3.891                                                          | R indices (all data)                    | R1 = 0.0485, wR2 = 0.1204                           |
| F(000)                                 | 1184                                                           | Largest diff. peak, hole                | 3.153, -2.010 e·Å <sup>-3</sup>                     |

Table S2 Selected bond lengths and angles of Pb-MOF.

|                     |           |                     |          |
|---------------------|-----------|---------------------|----------|
| Pb(1)-O(1)#1        | 2.490(8)  | Pb(1)-O(3)#2        | 2.724(8) |
| Pb(1)-O(8)          | 2.317(8)  | Pb(1)-O(8)#1        | 2.349(8) |
| Pb(2)-O(1)          | 2.484(8)  | Pb(2)-O(3)#2        | 2.589(9) |
| Pb(2)-O(4)#2        | 2.413(11) | Pb(2)-O(7)          | 2.601(9) |
| Pb(2)-O(8)          | 2.581(8)  |                     |          |
| O(8)-Pb(1)-O(8)#1   | 70.6(3)   | O(8)-Pb(1)-O(1)#1   | 83.3(3)  |
| O(8)#1-Pb(1)-O(1)#1 | 69.8(3)   | O(8)-Pb(1)-O(3)#2   | 78.4(3)  |
| O(8)#1-Pb(1)-O(3)#2 | 97.7(3)   | O(1)#1-Pb(1)-O(3)#2 | 160.6(3) |
| O(4)#2-Pb(2)-O(1)   | 94.2(3)   | O(4)#2-Pb(2)-O(8)   | 127.9(3) |
| O(1)-Pb(2)-O(8)     | 66.3(3)   | O(4)#2-Pb(2)-O(3)#2 | 51.3(3)  |
| O(8)-Pb(2)-O(3)#2   | 76.5(3)   | O(1)-Pb(2)-O(3)#2   | 73.1(3)  |
| O(1)-Pb(2)-O(7)     | 68.2(3)   | O(4)#2-Pb(2)-O(7)   | 81.2(3)  |
| O(3)#2-Pb(2)-O(7)   | 114.6(3)  | O(8)-Pb(2)-O(7)     | 126.7(3) |

Symmetry transformations used to generate equivalent atoms: #1 -x+1, -y+1, -z; #2 x, -y+3/2, z-1/2;

#3 x, -y+3/2, z+1/2.

Table S3. The results of bond-valence calculations of O8 .

|                 |        |                       |        |
|-----------------|--------|-----------------------|--------|
| Bond            | Pb1-O8 | Pb1 <sup>ii</sup> -O8 | Pb2-O8 |
| Bond length (Å) | 2.317  | 2.349                 | 2.581  |
| Valence         | 0.49   | 0.45                  | 0.28   |
| Total valence   | 1.22   |                       |        |

Table S4 The water uptakes and area swelling ratios of pure Nafion membrane and Pb-MOF/Nafion composite membranes.

| Membrane        | Wdry<br>/g | Wwet<br>/g | Adry<br>/cm <sup>2</sup> | Awet<br>/cm <sup>2</sup> | water<br>uptake | Area<br>swelling |
|-----------------|------------|------------|--------------------------|--------------------------|-----------------|------------------|
| Pure Nafion     | 0.0217     | 0.0247     | 0.2500                   | 0.2729                   | 13.82%          | 9.16%            |
| Pb-MOF/Nafion-3 | 0.0148     | 0.0173     | 0.2086                   | 0.2164                   | 16.89%          | 3.74%            |
| Pb-MOF/Nafion-5 | 0.0149     | 0.0175     | 0.2088                   | 0.2156                   | 17.45%          | 3.26%            |
| Pb-MOF/Nafion-7 | 0.0217     | 0.0257     | 0.2517                   | 0.2597                   | 18.43%          | 3.18%            |
| Pb-MOF/Nafion-9 | 0.0226     | 0.0271     | 0.2333                   | 0.2384                   | 19.91%          | 2.19%            |



Table S5 Proton conductivities of pure nafion membrane and Pb-MOF/Nafion composite membranes at different temperatures.

| T (°C) | pure Nafion<br>(S·cm <sup>-1</sup> ) | Pb-MOF/Nafion-3<br>(S·cm <sup>-1</sup> ) | Pb-MOF/Nafion-5<br>(S·cm <sup>-1</sup> ) | Pb-MOF/Nafion-7<br>(S·cm <sup>-1</sup> ) | Pb-MOF/Nafion-9<br>(S·cm <sup>-1</sup> ) |
|--------|--------------------------------------|------------------------------------------|------------------------------------------|------------------------------------------|------------------------------------------|
| 35     | 2.55×10 <sup>-3</sup>                | 2.49×10 <sup>-3</sup>                    | 2.06×10 <sup>-3</sup>                    | 3.77×10 <sup>-3</sup>                    | 2.63×10 <sup>-3</sup>                    |
| 40     | 2.95×10 <sup>-3</sup>                | 2.96×10 <sup>-3</sup>                    | 3.67×10 <sup>-3</sup>                    | 4.56×10 <sup>-3</sup>                    | 3.17×10 <sup>-3</sup>                    |
| 45     | 3.48×10 <sup>-3</sup>                | 3.69×10 <sup>-3</sup>                    | 4.37×10 <sup>-3</sup>                    | 5.50×10 <sup>-3</sup>                    | 4.59×10 <sup>-3</sup>                    |
| 50     | 4.19×10 <sup>-3</sup>                | 4.98×10 <sup>-3</sup>                    | 5.24×10 <sup>-3</sup>                    | 6.67×10 <sup>-3</sup>                    | 4.52×10 <sup>-3</sup>                    |
| 55     | 4.76×10 <sup>-3</sup>                | 5.19×10 <sup>-3</sup>                    | 6.55×10 <sup>-3</sup>                    | 7.55×10 <sup>-3</sup>                    | 7.81×10 <sup>-3</sup>                    |
| 60     | 5.43×10 <sup>-3</sup>                | 6.92×10 <sup>-3</sup>                    | 7.81×10 <sup>-3</sup>                    | 8.79×10 <sup>-3</sup>                    | 8.93×10 <sup>-3</sup>                    |
| 65     | 6.26×10 <sup>-3</sup>                | 7.65×10 <sup>-3</sup>                    | 9.67×10 <sup>-3</sup>                    | 1.09×10 <sup>-2</sup>                    | 1.05×10 <sup>-2</sup>                    |
| 70     | 7.00×10 <sup>-3</sup>                | 8.52×10 <sup>-3</sup>                    | 1.07×10 <sup>-2</sup>                    | 1.37×10 <sup>-2</sup>                    | 1.16×10 <sup>-2</sup>                    |
| 75     | 7.45×10 <sup>-3</sup>                | 9.43×10 <sup>-3</sup>                    | 1.17×10 <sup>-2</sup>                    | 1.53×10 <sup>-2</sup>                    | 1.30×10 <sup>-2</sup>                    |
| 80     | 8.48×10 <sup>-3</sup>                | 1.11×10 <sup>-2</sup>                    | 1.33×10 <sup>-2</sup>                    | 1.82×10 <sup>-2</sup>                    | 1.50×10 <sup>-2</sup>                    |
